# Supplementary material for: ZEB1-mediated fibroblast polarization controls inflammation and sensitivity to immunotherapy in colorectal cancer
Source: PubMed Central journal article supplement (PMC11315988; doi:10.1038/s44319-024-00186-7), 2024-06-27
Supplement: 44319_2024_186_MOESM1_ESM.pdf [file 44319_2024_186_MOESM1_ESM.pdf]

## **Table of Contents**

|                                                |    |
|------------------------------------------------|----|
| Appendix Fig. S1                               | 2  |
| Appendix Fig. S2                               | 4  |
| Appendix Fig. S3                               | 6  |
| Appendix Fig. S4                               | 7  |
| Appendix Table S1. Genotyping Primer sequences | 8  |
| Appendix Table S2. Antibodies                  | 9  |
| Appendix Table S3. qRT-PCR Primer sequences    | 11 |

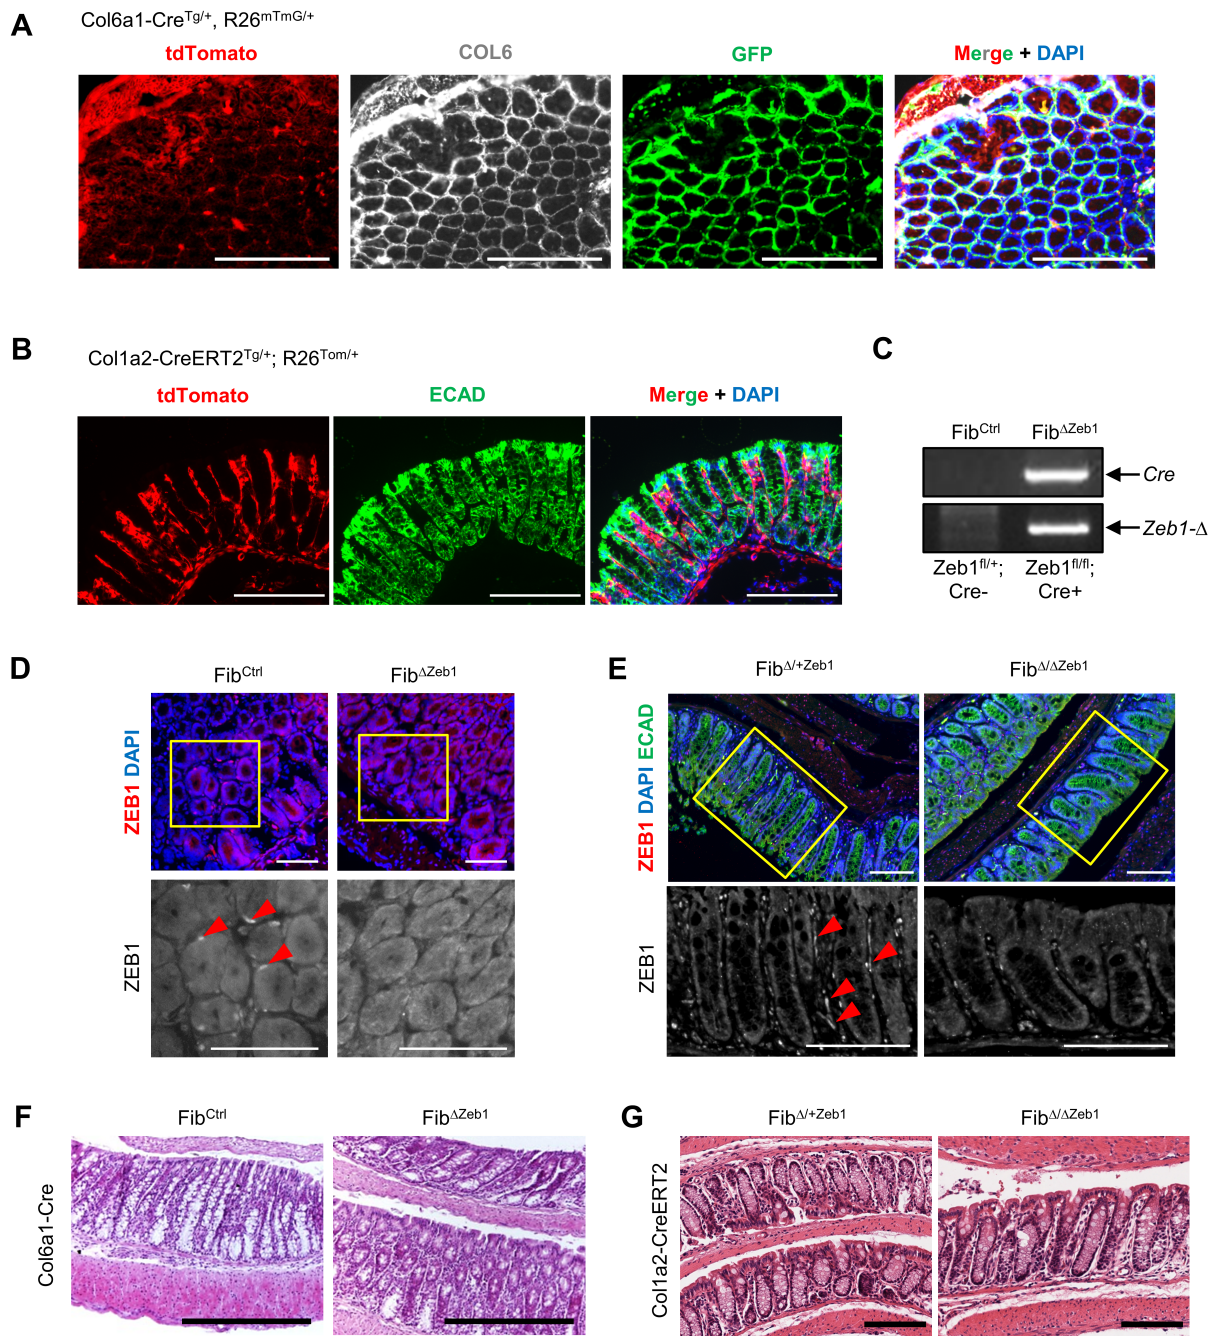

**Appendix Fig. S1. Loss of *Zeb1* in fibroblasts cells does not affect intestinal homeostasis.**

**(A)** Col6 immunofluorescence (IF) and DAPI staining on colon cryosections of Col6a1-Cre<sup>Tg/+</sup>;Rosa26-mTmG<sup>Tg/+</sup> mice. Overlay with tdTomato and GFP fluorescence. Scale bar: 200  $\mu$ m.

**(B)** IF of tdTomato, E-cadherin and DAPI on colon sections of Col1a2-CreERT<sup>Tg/+</sup>;Rosa26-tdTomato<sup>Tg/+</sup> mice. Scale bar: 200  $\mu$ m.

**(C)** Genotyping of colon DNA confirms presence of Cre transgene and Col6a1-Cre induced recombination of *Zeb1* in indicated mouse genotypes.

**(D, E)** ZEB1 IF and DAPI staining on colon sections of Fib<sup>Ctrl</sup> (*Zeb1*<sup>fl/fl</sup>;Col6a1-Cre<sup>+/+</sup>) and Fib <sup>$\Delta$ Zeb1</sup> (*Zeb1*<sup>fl/fl</sup>;Col6a1-Cre<sup>Tg/+</sup>) mice **(D)** and ZEB1/E-cadherin IF and DAPI staining on colon sections of heterozygous Fib <sup>$\Delta$ /+Zeb1</sup> (*Zeb1*<sup>fl/+</sup>;Col1a2-CreERT2<sup>Tg/+</sup>) and Fib <sup>$\Delta$ Zeb1</sup> (*Zeb1*<sup>fl/fl</sup>;Col1a2-CreERT2<sup>Tg/+</sup>) tamoxifen-fed mice **(E)**. Bottom rows show magnification of ZEB1 of the marked areas in grayscale. Red arrowheads indicate ZEB1-positive stromal cells, which are absent in Fib <sup>$\Delta$ Zeb1</sup>. Scale bars: 100  $\mu$ m.

**(F, G)** H&E stainings of colon sections from Fib<sup>Ctrl</sup> and Fib <sup>$\Delta$ Zeb1</sup> mice **(F)**, as well as of Fib<sup>+/ $\Delta$ Zeb1</sup> and Fib <sup>$\Delta$ Zeb1</sup> tamoxifen-treated mice **(G)**. Scale bars: 200  $\mu$ m.

Data information: Scale bars represent 200  $\mu$ m (A-B,F-G) or 100  $\mu$ m (D-E).

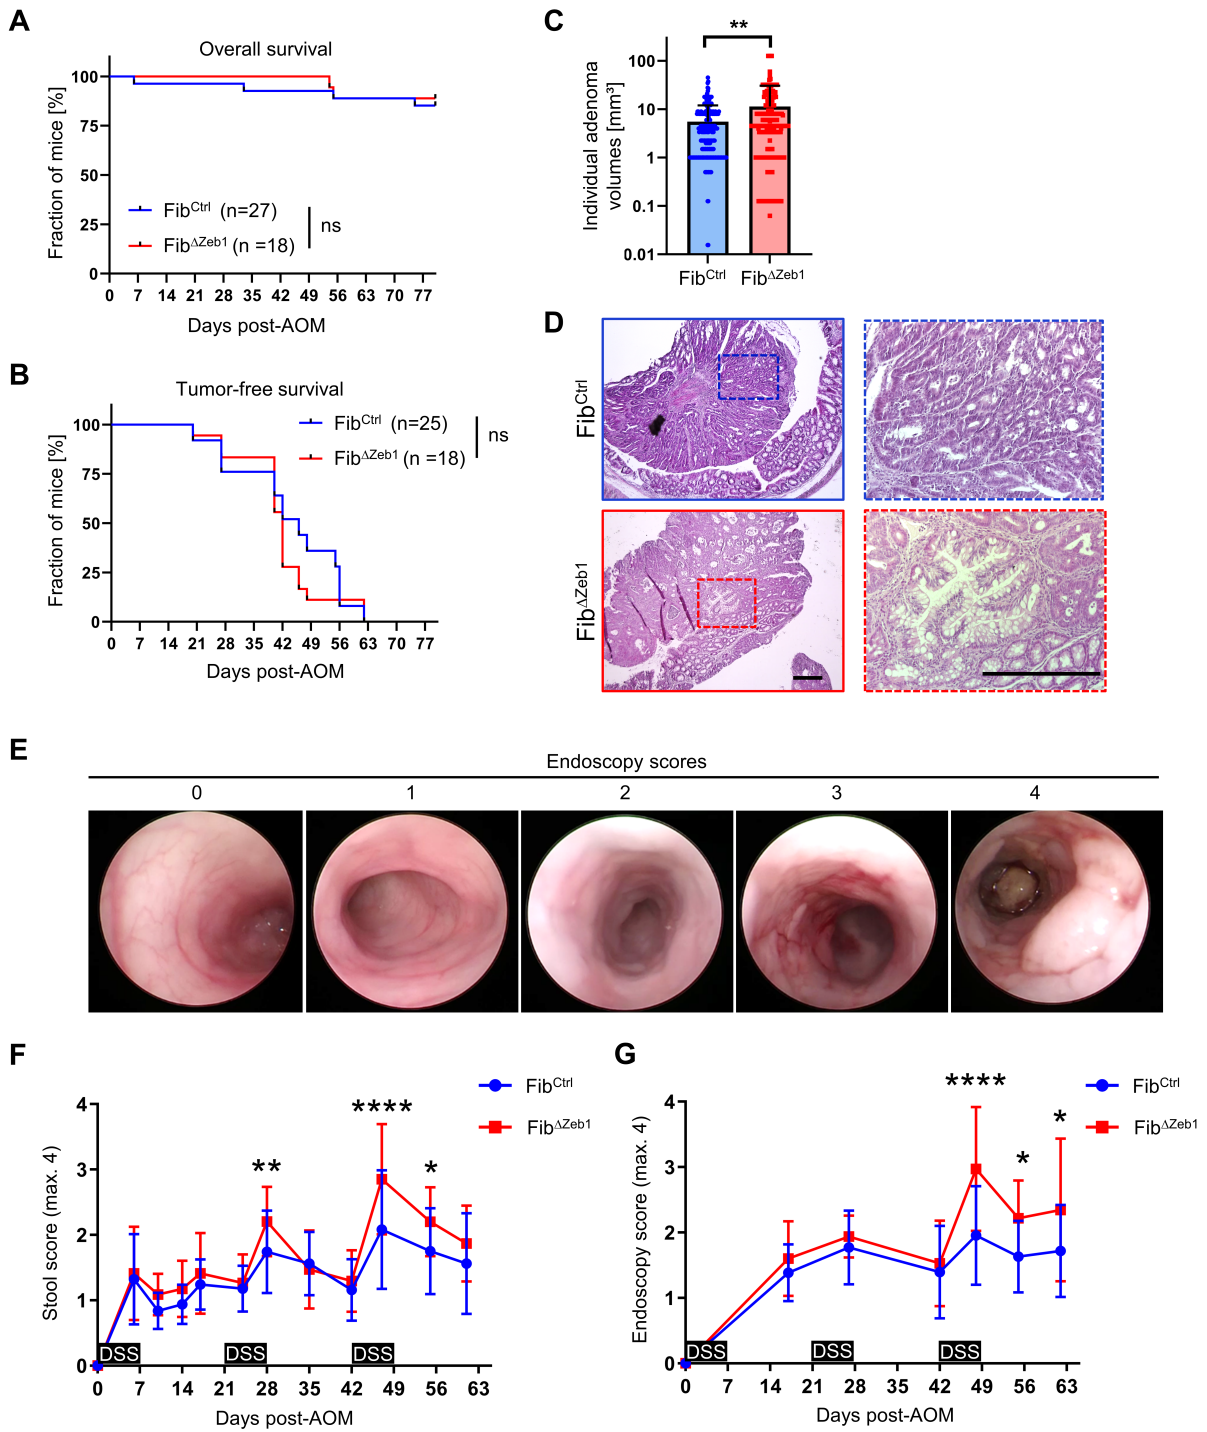

**Appendix Fig. S2. ZEB1 in fibroblasts moderately exacerbates AOM/DSS-induced colitis.**

**(A, B)** Kaplan-Meier plots showing overall survival **(A)** and tumor-free survival **(B)** of Fib<sup>Ctrl</sup> and Fib<sup>ΔZeb1</sup> mice during AOM/DSS tumorigenesis. Numbers of experimental mice are indicated (Overall: p=0.7151, Tumor-free: p=0.3613, Mantel-Cox test).

**(C)** Quantification of volumes of individual adenomas after AOM/DSS tumorigenesis (n=204/207 for Fib<sup>Ctrl</sup>/Fib<sup>ΔZeb1</sup> depicted on logarithmic scale and derived from 23/16 mice, p=0.0015, Mann-Whitney test).

**(D)** Representative images of H&E stainings of colon adenoma sections from Fib<sup>Ctrl</sup> and Fib<sup>ΔZeb1</sup> mice. Higher magnification of the indicated region is shown on the right.

**(E-G)** Representative endoscopic images **(E)**, and associated stool **(F)** and endoscopy scores **(G)**. Quantification of intestinal inflammation based on stool scoring **(F)** and on endoscopy scoring **(G)**, also refer to images in E). n=25/17 **(F)** and n=25/18 **(G)** mice for Fib<sup>Ctrl</sup>/Fib<sup>ΔZeb1</sup>, Stool day 28, 47, 55: p= 0.0070, <00001, 0.0127, pUncorrected Fisher's LSD, Endoscopy day 48, 55, 62: p=<0.0001, 0.0343, 0.0195, Šídák's multiple comparisons test).

Data information: Data are presented as mean ± SD (C,F-G). Scale bars represent 300 μm (D).

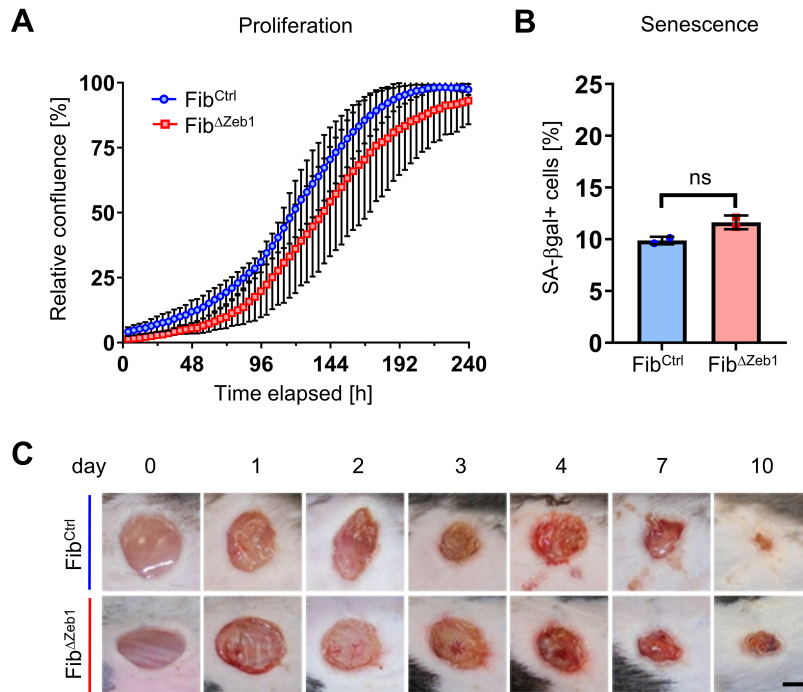

**Appendix Fig. S3. Effects of *Zeb1* loss in fibroblasts on proliferation, senescence and wound healing.**

**(A)** Proliferation assay by live-cell monitoring of cell confluence in Fib<sup>Ctrl</sup> and Fib<sup>ΔZeb1</sup> fibroblast cultures using IncuCyte (n=2/2 for Fib<sup>Ctrl</sup>/Fib<sup>ΔZeb1</sup>).

**(B)** Senescence-associated β-galactosidase (SA-β-gal) assay in cultured Fib<sup>Ctrl</sup> and Fib<sup>ΔZeb1</sup> fibroblasts (n=2/2 for Fib<sup>Ctrl</sup>/Fib<sup>ΔZeb1</sup>, p=0.0819, student's t-test).

**(C)** Representative images of the *in vivo* wound healing assay in Fib<sup>Ctrl</sup> and Fib<sup>ΔZeb1</sup> mice (n=16/22).

Data information: Data are presented as mean ± SD (A-B). Scale bars represent 2 mm (C).

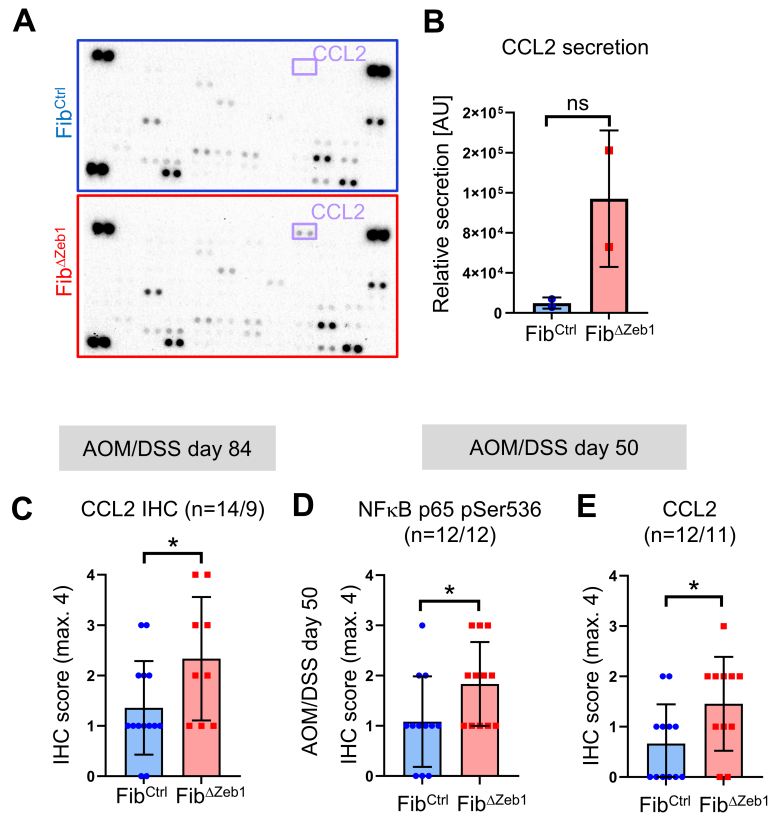

**Appendix Fig. S4. Increased CCL2 secretion in *Zeb1* deficient CAFs and IHC staining during AOM/DSS tumorigenesis.**

(**A**, **B**) Secretome analysis of Fib<sup>Ctrl</sup> and Fib<sup>ΔZeb1</sup> CAFs isolated from AOM/DSS tumors using a secretome array showing one representative exposure of an arrayed membrane (**A**) and quantification using two independent pairs of CAFs (p=0.1639, student's t-test) (**B**).

(**C**) IHC-based quantification of stromal CCL2 in tumors 84 days after AOM/DSS tumorigenesis. Numbers of experimental mice per genotype are indicated (p=0.0414, student's t-test)

(**D**, **E**) IHC-based quantification of phospho-NFκB p65 (Ser536) (**D**) and stromal CCL2 (**E**) in colons 50 days after AOM/DSS tumorigenesis. Numbers of experimental mice per genotype are indicated (p65: p=0.0459, Ccl2: p=0.0388, student's t-test).

Data information: Data are presented as mean ± SD (B-E).

### Appendix Table S1. Genotyping Primer sequences

| Target gene                          | Primer direction | Primer sequence               |
|--------------------------------------|------------------|-------------------------------|
| <i>Zeb1 floxed</i>                   | forward          | CGTGATGGAGCCAGAATCTGACCCC     |
| <i>Zeb1 floxed</i>                   | reverse          | GGCCTGTCTTTCTCAGCAGTGTGG      |
| <i>Zeb1 deleted</i>                  | reverse          | GCCATCTCACCAGCCCTTACTGTGC     |
| <i>Cre</i>                           | forward          | TCCCCGCAGAACCTGAAGATGTTCCG    |
| <i>Cre</i>                           | reverse          | GCCAGATTACGTATATCCTGGCAGC     |
| <i>Col1a2-Cre</i>                    | forward          | CAGGAGGTTTCGACTAAGTTGG        |
| <i>Col1a2-Cre</i>                    | reverse          | CATGTCCATCAGGTTCTTGC          |
| <i>Col6a1-Cre</i>                    | forward          | ACACACCGTAGCAACAGGAAGTC       |
| <i>Col6a1-Cre</i>                    | reverse          | TAGCTGGCCCAAATGTTGCT          |
| <i>R26-mTmG</i>                      | forward          | GTAATTGGCATATGATACACTTGATGTAC |
| <i>R26-mTmG</i>                      | reverse          | AAAGTCGCTCTGAGTTGTTAT         |
| <i>p53FRT</i>                        | forward          | TCCCTTCCCTTATCCCTGTC          |
| <i>p53FRT</i>                        | reverse          | GGGCACAGTATCCACAGAG           |
| <i>FLP</i>                           | forward          | GAGCCTGCAGTTCAAGTACAAGAC      |
| <i>FLP</i>                           | reverse          | GTTGTAAGGGATGATGGTGAAGT       |
| <i>Gabra1 (internal DNA control)</i> | forward          | AACACACACTGGAGGACTGGCTAGG     |
| <i>Gabra1 (internal DNA control)</i> | reverse          | CAATGGTAGGCTCACTCTGGGAGATGATA |



## Appendix Table S2. Antibodies

| Target antigen                      | used for | labeled         | company                  | clone             | catalogue number | working concentration | RRIDs                                                                                |
|-------------------------------------|----------|-----------------|--------------------------|-------------------|------------------|-----------------------|--------------------------------------------------------------------------------------|
| cl. CASP3                           | IHC      | unconjugated    | Cell Signaling           | rabbit polyclonal | 9661S            | 1:200 dilution        | Cell Signaling Technology Cat# 9661 (also NYUIHC-314, 9661S, 9661L), RRID:AB_2341188 |
| KI67                                | IHC      | unconjugated    | abcam                    | SP6               | ab16667          | 1:300 dilution        | Abcam Cat# ab16667, RRID:AB_302459                                                   |
| CD4                                 | IHC      | unconjugated    | Sino Biol                | Clone #1          | 50134-R001       | 1:500 dilution        | Sino Biological Cat# 50134-R001, RRID:AB_2860490                                     |
| CD8 $\alpha$                        | IHC      | unconjugated    | Sino Biol                | rabbit polyclonal | 50389-T26        | 1:500 dilution        | -                                                                                    |
| FOXP3                               | IHC      | unconjugated    | eBiosciences             | FJK-16s           | 14-5773-82       | 1:200 dilution        | Thermo Fisher Scientific Cat# 14-5773-82, RRID:AB_467576                             |
| PD-L1                               | IHC      | unconjugated    | LSBio                    | rabbit polyclonal | LS-C19686        | 1:300 dilution        | -                                                                                    |
| B220                                | IHC      | unconjugated    | Thermo Fisher Scientific | RA3-6B2           | 14-0452-82       | 1:800 dilution        | Thermo Fisher Scientific Cat# 14-0452-82, RRID:AB_467254                             |
| MCP1 (CCL2)                         | IHC      | unconjugated    | Thermo Fisher Scientific | rabbit polyclonal | PA5-115555       | 1:200 dilution        | Thermo Fisher Scientific Cat# PA5-115555, RRID:AB_2893318                            |
| RELA/NF $\kappa$ B p-p65 (p-Ser536) | IHC      | unconjugated    | Novus                    | rabbit polyclonal | NB100-82088      | 1:100 dilution        | Novus Cat# NB100-82088, RRID:AB_1144569                                              |
| ZEB1                                | IHC      | unconjugated    | Novus                    | rabbit polyclonal | NBP1-05987       | 1:250 dilution        | Novus Cat# NBP1-05987, RRID:AB_1556166                                               |
| CD4                                 | IHC      | unconjugated    | Cell Signaling           | D7D2Z             | 25229            | 1:100 dilution        | Cell Signaling Technology Cat# 25229, RRID:AB_2798898                                |
| FOXP3                               | IHC      | unconjugated    | R&D Systems              | 1054C             | MAB8214          | 1:500 dilution        | R and D Systems Cat# MAB8214, RRID:AB_2929004                                        |
| PD-L1                               | IHC      | unconjugated    | Cell Signaling           | E1L3N             | 13684S           | 1:200 dilution        | -                                                                                    |
| CD8                                 | IHC      | unconjugated    | Cell Signaling           | D4W2Z             | 98941            | 1:500 dilution        | Cell Signaling Technology Cat# 98941, RRID:AB_2756376                                |
| F4/80                               | IHC      | unconjugated    | Life Technologies        | BM8               | MF48000          | 1:300 dilution        | Thermo Fisher Scientific Cat# MF48000, RRID:AB_10376289                              |
| F4/80                               | IHC      | unconjugated    | Biorad                   | Cl:A3-1           | MCA497           | 1:200 dilution        | Bio-Rad Cat# MCA497, RRID:AB_2098196                                                 |
| anti-rabbit-polymer                 | IHC      | HRP             | DAKO                     |                   | K4003            |                       | Agilent Cat# K4003 (also K4002), RRID:AB_2630375                                     |
| anti-rat-HRP                        | IHC      | HRP             | Life Technologies        | rabbit polyclonal | A18915           |                       | Thermo Fisher Scientific Cat# A18915, RRID:AB_2535690                                |
| ZEB1                                | IF       | unconjugated    | Sigma                    | rabbit polyclonal | HPA027524        | 1:200 dilution        | Sigma-Aldrich Cat# HPA027524, RRID:AB_1844977                                        |
| COL6                                | IF       | unconjugated    | abcam                    | EPR17072          | ab182744         | 1:500 dilution        | Abcam Cat# ab182744, RRID:AB_2847919                                                 |
| ZEB1                                | IF       | unconjugated    | Bethyl                   | rabbit polyclonal | IHC-00419        | 1:200 dilution        | Bethyl Cat# IHC-00419 (also IHC-00419-T), RRID:AB_1659852                            |
| E-cadherin                          | IF       | unconjugated    | BD Biosciences           | 36                | 610181           | 1:200 dilution        | BD Biosciences Cat# 610181, RRID:AB_397580                                           |
| $\alpha$ SMA                        | IF       | unconjugated    | Thermo Fisher Scientific | 1A4               | 14-9760-82       | 1:200 dilution        | Thermo Fisher Scientific Cat# 14-9760-82 (also 14-9760), RRID:AB_2572996             |
| anti-mouse                          | IF       | Alexa Fluor 488 | Thermo Fisher Scientific | donkey polyclonal | A21202           | 1:500 dilution        | Thermo Fisher Scientific Cat# A-11055, RRID:AB_2534102                               |

|                     |              |                 |                          |                   |             |                  |                                                                                |
|---------------------|--------------|-----------------|--------------------------|-------------------|-------------|------------------|--------------------------------------------------------------------------------|
| anti-rabbit         | IF           | Alexa Fluor 594 | Thermo Fisher Scientific | donkey polyclonal | A21207      | 1:500 dilution   | Thermo Fisher Scientific Cat# A-21207, RRID:AB_141637                          |
| anti-rabbit         | IF           | Alexa Fluor 647 | Thermo Fisher Scientific | donkey polyclonal | A31573      | 1:500 dilution   | Thermo Fisher Scientific Cat# A-31571, RRID:AB_162542                          |
| IκBα                | Western blot | unconjugated    | Cell Signaling           | rabbit polyclonal | CS9242      | 1:5000 dilution  | Cell Signaling Technology Cat# 9242, RRID:AB_331623                            |
| NFκB p65            | Western blot | unconjugated    | Cell Signaling           | D14E12            | CS8242      | 1:2000 dilution  | Cell Signaling Technology Cat# 8242, RRID:AB_10859369                          |
| p-IκBα Ser32        | Western blot | unconjugated    | Cell Signaling           | 14D4              | CS2859      | 1:1000 dilution  | Cell Signaling Technology Cat# 2859 (also 2859S, 2859P, 2859L), RRID:AB_561111 |
| p-NFκB p65 Ser536   | Western blot | unconjugated    | Cell Signaling           | 7F1               | CS3036      | 1:1000 dilution  | Cell Signaling Technology Cat# 3036, RRID:AB_331281                            |
| Zeb1                | Western blot | unconjugated    | Sigma                    | rabbit polyclonal | HPA027524   | 1:2000 dilution  | Sigma-Aldrich Cat# HPA027524, RRID:AB_1844977                                  |
| β-actin             | Western blot | unconjugated    | Sigma                    | AC-15             | A5441       | 1:20000 dilution | Sigma-Aldrich Cat# A5441, RRID:AB_476744                                       |
| anti-rabbit IgG-HRP | Western blot | unconjugated    | Dianova                  | goat polyclonal   | 111-035-144 | 1:10000 dilution | Jackson ImmunoResearch Labs Cat# 111-035-144, RRID:AB_2307391                  |
| anti-mouse IgG-HRP  | Western blot | unconjugated    | Dianova                  | goat polyclonal   | 115-035-146 | 1:10000 dilution | Jackson ImmunoResearch Labs Cat# 115-035-146, RRID:AB_2307392                  |
| EPCAM               | Phenoptics   | unconjugated    | Cell Signaling           | E6V8Y             | 93790S      | 1:500 dilution   | Cell Signaling Technology Cat# 93790, RRID:AB_2800214                          |
| VIM                 | Phenoptics   | unconjugated    | abcam                    | EPR3776           | ab92547     | 1:100 dilution   | Abcam Cat# ab92547, RRID:AB_10562134                                           |
| αSMA                | Phenoptics   | unconjugated    | Sigma                    | 1A4               | F3777       | 1:5000 dilution  | Sigma-Aldrich Cat# F3777, RRID:AB_476977                                       |
| C3                  | Phenoptics   | unconjugated    | abcam                    | EPR19394          | ab200999    | 1:2000 dilution  | Abcam Cat# ab200999, RRID:AB_2924273                                           |
| MHCII               | Phenoptics   | unconjugated    | Invitrogen               | M5/114.15.2       | 14-5321-82  | 1:400 dilution   | Thermo Fisher Scientific Cat# 14-5321-82, RRID:AB_467561                       |
| CD45                | Phenoptics   | unconjugated    | Cell Signaling           | D3F8Q             | 70257       | 1:500 dilution   | Cell Signaling Technology Cat# 70257, RRID:AB_2799780                          |
| CD16/CD32           | FACS         | unconjugated    | BD Biosciences           | 2.4G2             | 553142      | 1:100 dilution   | BD Biosciences Cat# 553141, RRID:AB_394656                                     |
| CD45                | FACS         | PE/Cy7          | BioLegend                | 30-F11            | 103113      | 1:100 dilution   | BioLegend Cat# 103114 (also 103113), RRID:AB_312979                            |
| CD31                | FACS         | PE              | Thermo Fisher Scientific | 390               | 12-0311-82  | 1:100 dilution   | Thermo Fisher Scientific Cat# 12-0311-82, RRID:AB_465632                       |
| EPCAM               | FACS         | eFluor450       | Thermo Fisher Scientific | G8.8              | 48-5791-82  | 1:100 dilution   | Thermo Fisher Scientific Cat# 48-5791-82, RRID:AB_10717090                     |
| CD140a              | FACS         | APC             | Thermo Fisher Scientific | APA5              | 17-1401-81  | 1:100 dilution   | Thermo Fisher Scientific Cat# 17-1401-81, RRID:AB_529482                       |

**Appendix Table S3. qRT-PCR Primer sequences**

| <b>Target mRNA</b> | <b>primer direction</b> | <b>primer sequence</b>   | <b>UPL</b> |
|--------------------|-------------------------|--------------------------|------------|
| <i>Zeb1</i>        | forward                 | AGGTGATCCAGCCAAACG       | 93         |
| <i>Zeb1</i>        | reverse                 | AGGCCTGACATGTAGTCTTGTG   | 93         |
| <i>Acta2</i>       | forward                 | CTCTCTTCCAGCCATCTTTCAT   | 58         |
| <i>Acta2</i>       | reverse                 | TATAGGTGGTTTCGTGGATGC    | 58         |
| <i>Gapdh</i>       | forward                 | GGGTTCTATAAATACGGACTGC   | 52         |
| <i>Gapdh</i>       | reverse                 | CCATTTTGTCTACGGGACGA     | 52         |
| <i>Gapdh #2</i>    | forward                 | AGCTTGTCAACAACGGGAAG     | 9          |
| <i>Gapdh #2</i>    | reverse                 | TTTGATGTTAGTGGGGTCTCG    | 9          |
| <i>Pdgfrb</i>      | forward                 | TCAAGCTGCAGGTCAATGTC     | 67         |
| <i>Pdgfrb</i>      | reverse                 | CCATTGGCAGGGTGACTC       | 67         |
| <i>Ccl2</i>        | forward                 | CCAATGAGTAGGCTGGAGAGC    | 62         |
| <i>Ccl2</i>        | reverse                 | CCCATTCTTCTTGGGGTCA      | 62         |
| <i>Cxcl1</i>       | forward                 | GACTCCAGCCACACTCCAAC     | 83         |
| <i>Cxcl1</i>       | reverse                 | TGACAGCGCAGCTCATTG       | 83         |
| <i>Hprt</i>        | forward                 | AAGCTTGCTGGTGAAAAGGA     | -          |
| <i>Hprt</i>        | reverse                 | TTGCGCTCATCTTAGGCTTT     | -          |
| <i>Tagln</i>       | forward                 | CGGCCTTTAAACCCCTCACC     | -          |
| <i>Tagln</i>       | reverse                 | GACTGCACTTCTCGGCTCAT     | -          |
| <i>Acta2 #2</i>    | forward                 | AGGGCTGTTTTCCCATCCAT     | -          |
| <i>Acta2 #2</i>    | reverse                 | GGCCATTCCAACCATTACTC     | -          |
| <i>Ccl2 #2</i>     | forward                 | AGCCTACTCATTGGGATCATCTTG | -          |
| <i>Ccl2 #2</i>     | reverse                 | CAGCCAGATGCAGTTAACGC     | -          |
| <i>Cxcl1 #2</i>    | forward                 | ACTGCACCCAAACCGAAGTC     | -          |
| <i>Cxcl1 #2</i>    | reverse                 | TGGGGACACCTTTTAGCATCTT   | -          |
