# Supplementary material for: ZEB1-mediated fibroblast polarization controls inflammation and sensitivity to immunotherapy in colorectal cancer
Source: PubMed Central journal article supplement (PMC11315988; doi:10.1038/s44319-024-00186-7), 2024-06-27
Supplement: 44319_2024_186_MOESM9_ESM.pdf [file 44319_2024_186_MOESM9_ESM.pdf]

## Expanded View Figures

### Figure EV1. Loss of *Zeb1* in fibroblasts does not affect morphology of primary tumors in the orthotopic transplantation model.

(A) IF images and quantification of ZEB1 expression in tumor stroma after orthotopic transplantation of AKP tumor organoids ( $n = 10/9$  independent mice for  $\text{Fib}^{\text{Ctrl}}/\text{Fib}^{\Delta\text{Zeb1}}$ ,  $P < 0.0001$ , Student's  $t$  test). (B) Quantification of primary tumor engraftment in treatment-naïve  $\text{Fib}^{\text{Ctrl}}$  and  $\text{Fib}^{\Delta\text{Zeb1}}$  mice after orthotopic transplantation of AKP tumor organoids. Numbers of experimental mice are indicated. (C) Tumor volume after orthotopic transplantation of AKP tumor organoids ( $n = 8/5$  independent mice for  $\text{Fib}^{\text{Ctrl}}/\text{Fib}^{\Delta\text{Zeb1}}$ ,  $P = 0.7584$ , Student's  $t$  test). (D, E) Representative H&E stainings of AKP (D) and  $\text{AKP}^{\text{re}}$  (E) tumor sections. Top left corners show higher magnification of the indicated regions. (F-H) Analysis of tumors after orthotopic transplantation of  $\text{AKP}^{\text{re}}$  tumor organoids in treatment-naïve  $\text{Fib}^{\text{Ctrl}}$  and  $\text{Fib}^{\Delta\text{Zeb1}}$  mice. (F) Tumor onset ( $n = 4/5$  for  $\text{Fib}^{\text{Ctrl}}/\text{Fib}^{\Delta\text{Zeb1}}$ ,  $P = 0.6401$ , Mantel-Cox test). (G) Quantification of tumor engraftment. Numbers of experimental mice are indicated. (H) Tumor volume ( $n = 4/4$  independent mice for  $\text{Fib}^{\text{Ctrl}}/\text{Fib}^{\Delta\text{Zeb1}}$ ). (I-K) Analysis of tumors after orthotopic transplantation of  $\text{AKP}^{\text{re}}$  tumor organoids in control IgG-treated  $\text{Fib}^{\text{Ctrl}}$  and  $\text{Fib}^{\Delta\text{Zeb1}}$  mice. These mice are shown again as controls in Fig. 5. (I, J) Tumor onset (I) and quantification (J) after orthotopic transplantation of  $\text{AKP}^{\text{re}}$  tumor organoids ( $n = 12/14$  for  $\text{Fib}^{\text{Ctrl}}/\text{Fib}^{\Delta\text{Zeb1}}$ ,  $P = 0.4564$ , Mantel-Cox test). (K) Tumor volumes ( $n = 8/10$  independent mice for  $\text{Fib}^{\text{Ctrl}}/\text{Fib}^{\Delta\text{Zeb1}}$ ). Only tumors collected after day 28 were included. Data information: Data are represented as mean  $\pm$  SD (A, C, H, K). Scale bars represent  $50\ \mu\text{m}$  (A) or  $1\ \text{mm}$  (D, E). Source data are available online for this figure.

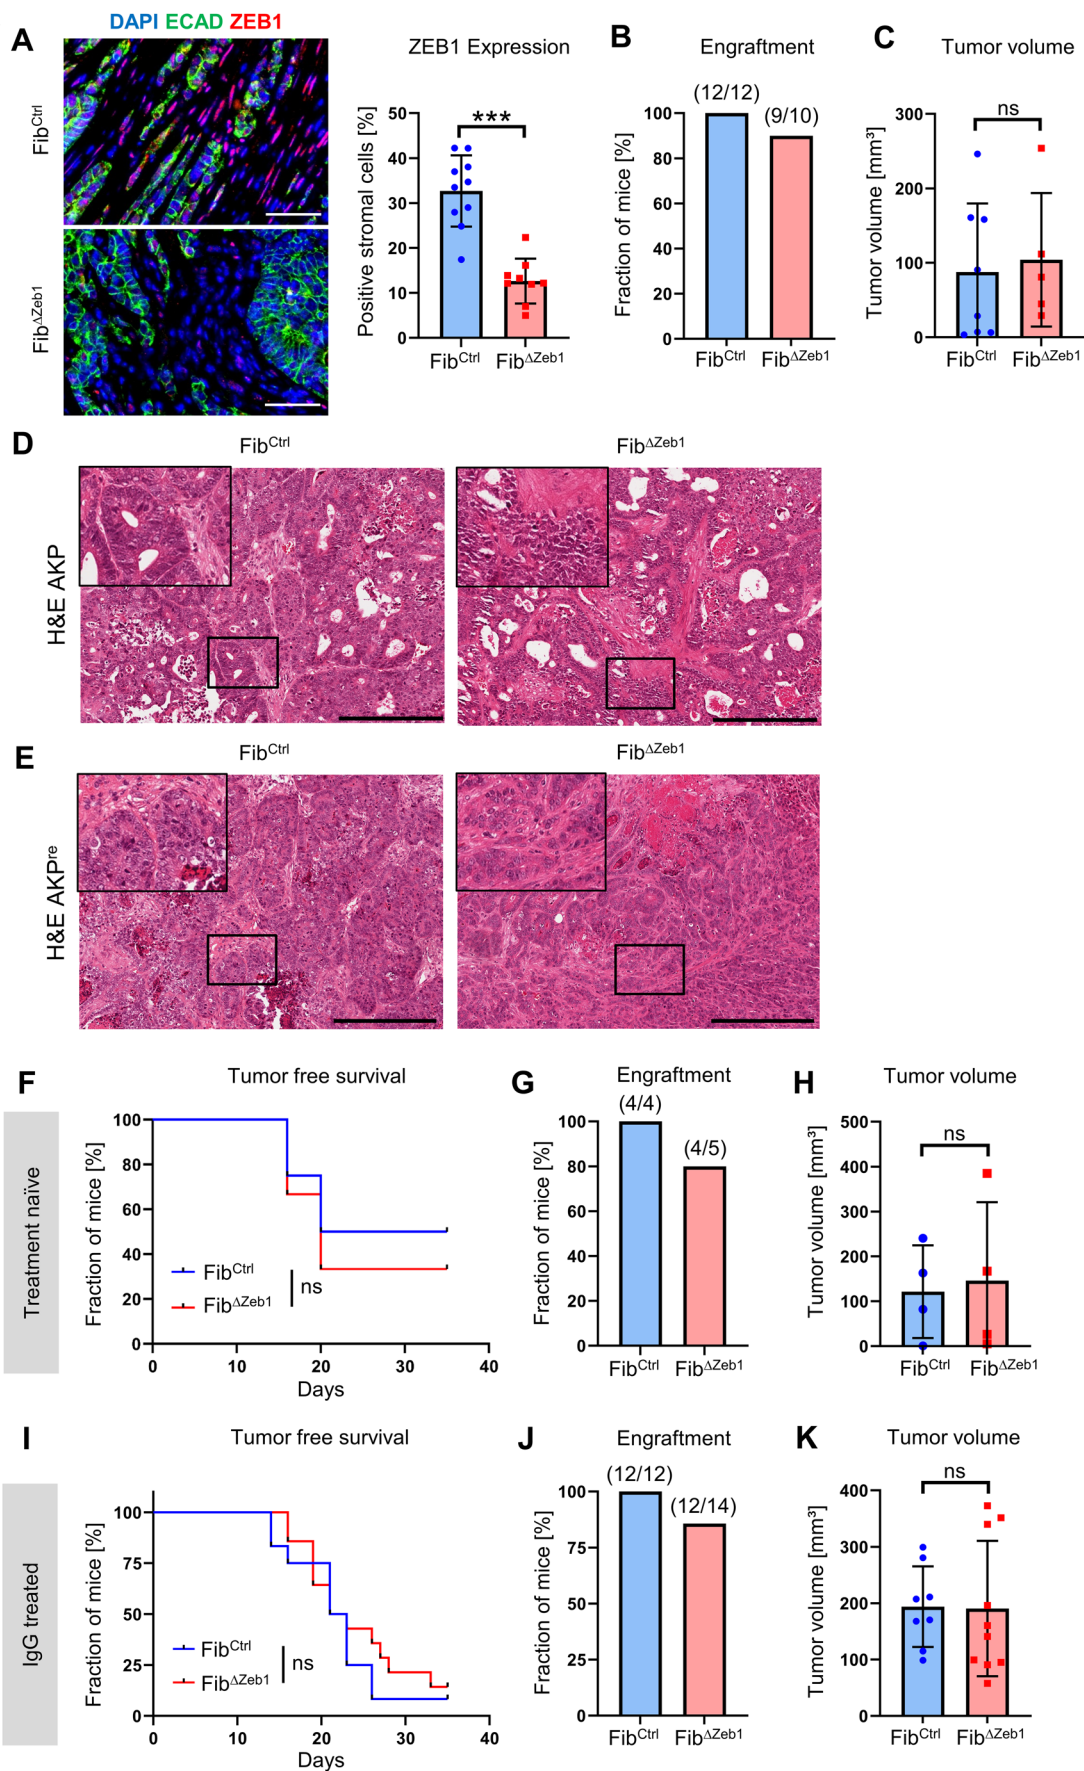

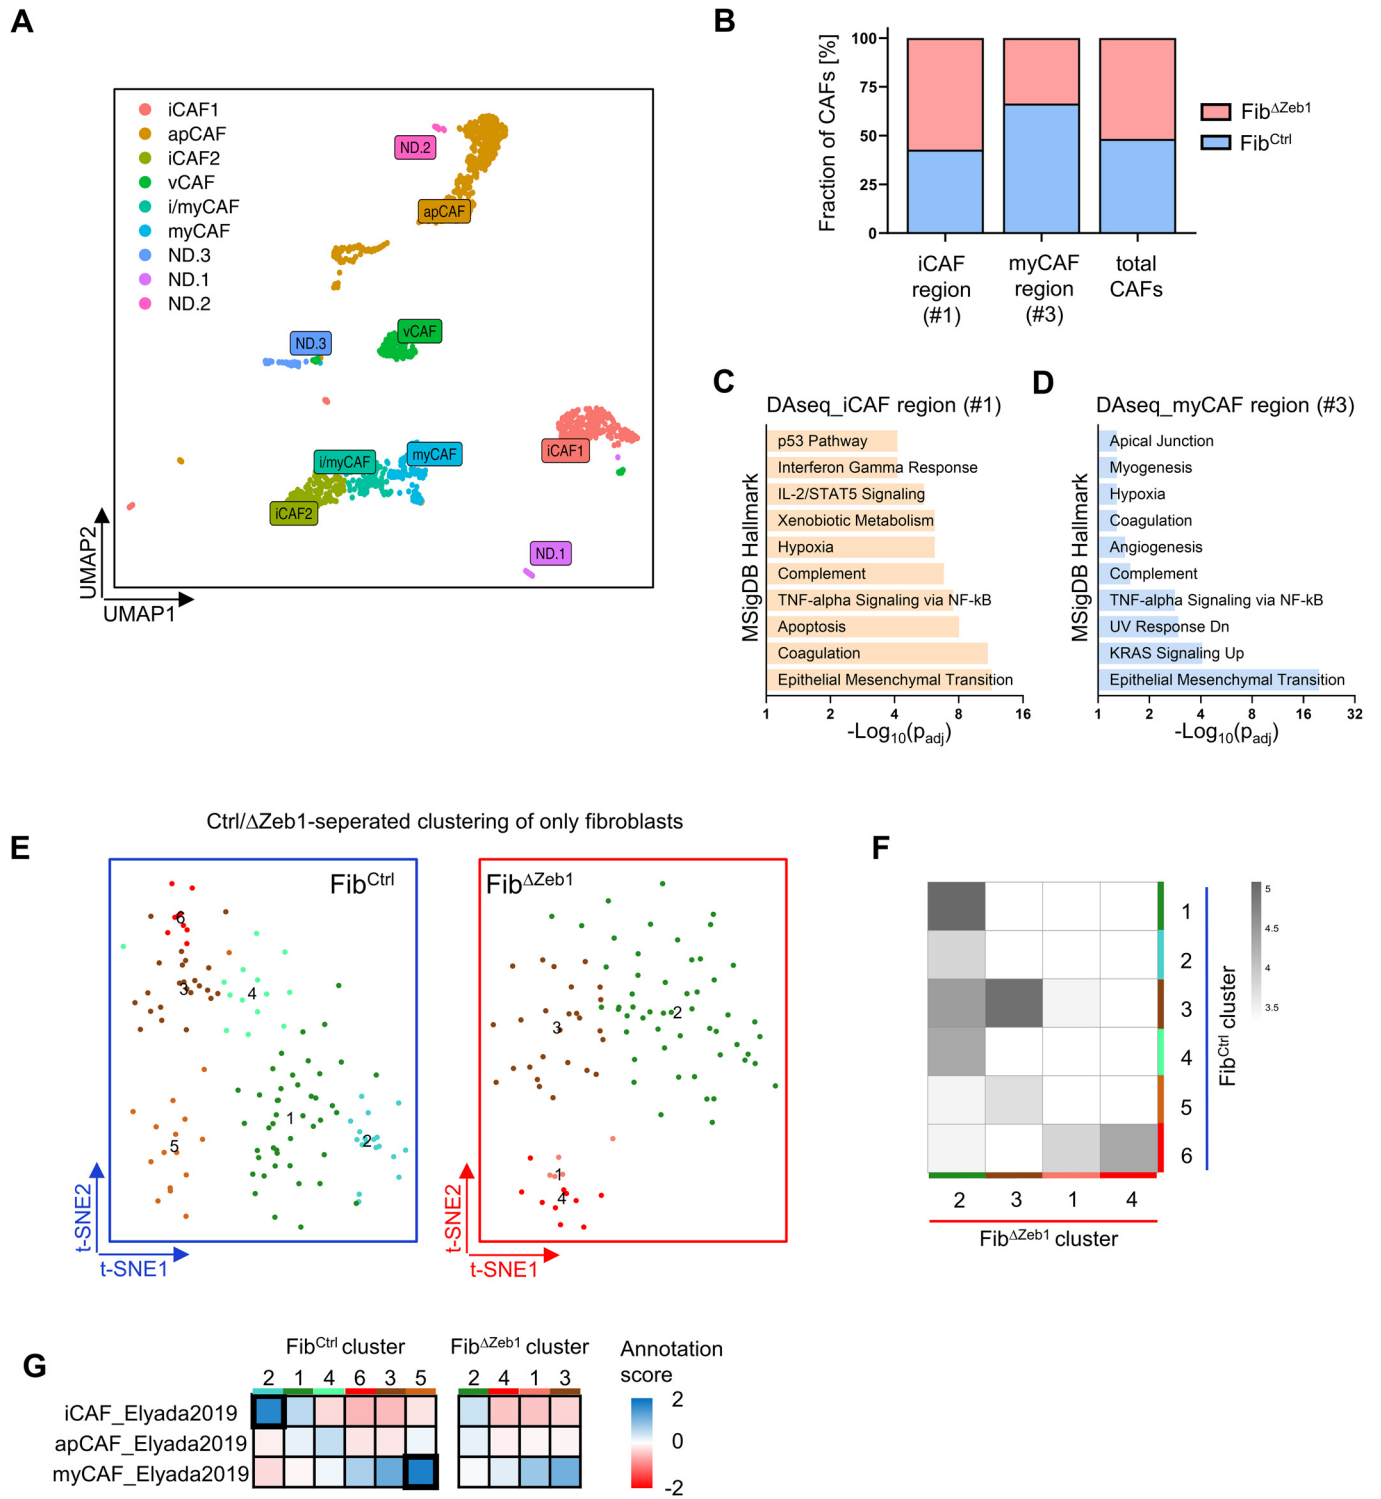

◀ **Figure EV2. scRNA-seq in AOM/DSS and orthotopic models show reduced CAF diversity and impaired subtype-specific gene expression in  $Fib^{\Delta Zeb1}$  tumors.**

(A) Phenotypic annotation of AOM/DSS CAFs ( $n = 3$  mice per genotype; corresponding to Fig. 2) upon integrated clustering by scoring of iCAF/myCAF/apCAF/mCAF/vCAF gene signatures (Bartoschek et al, 2018; Elyada et al, 2019) and displayed on UMAP Leiden clusters, pooled according to the determined scores. Note that 'i/myCAFs' share features of iCAFs and myCAFs and that the identities of 3 cell clusters could not be determined (ND) using these gene sets. (B) Genotype distribution of cells in AOM/DSS CAFs in DA regions (please refer to Fig. 2). The fraction of  $Fib^{Ctrl}$  and  $Fib^{\Delta Zeb1}$  CAFs in each DA region or among all CAFs is shown. (C, D) Gene set enrichment analysis using Enrichr of marker genes from Daseq region 1 (C) and 3 (D) as compared to all other CAFs (Benjamini-Hochburg corrected Fisher's exact test). (E) t-SNE sub-clustering of fibroblasts separately in  $Fib^{Ctrl}$  (left) and  $Fib^{\Delta Zeb1}$  mice (right) of the orthotopic model showing less clusters in  $Fib^{\Delta Zeb1}$ . (F) Cluster similarities defined by cluster annotations based on 'SingleR' scores (see "Methods" for details) (Aran et al, 2019). Grayscale shows the  $\log_2$ -transformed number of cells across clusters. Note the low similarity of  $Fib^{\Delta Zeb1}$  cells with  $Fib^{Ctrl}$  clusters 2 and 5. (G) Heatmap showing the similarity (annotation scores) of gene expression in CAF clusters with published gene sets. Note, the high scores of  $Fib^{Ctrl}$  clusters 2 and 5 when compared with 'iCAF' and 'myCAF' signatures, respectively, and absence in  $Fib^{\Delta Zeb1}$ . Source data are available online for this figure.

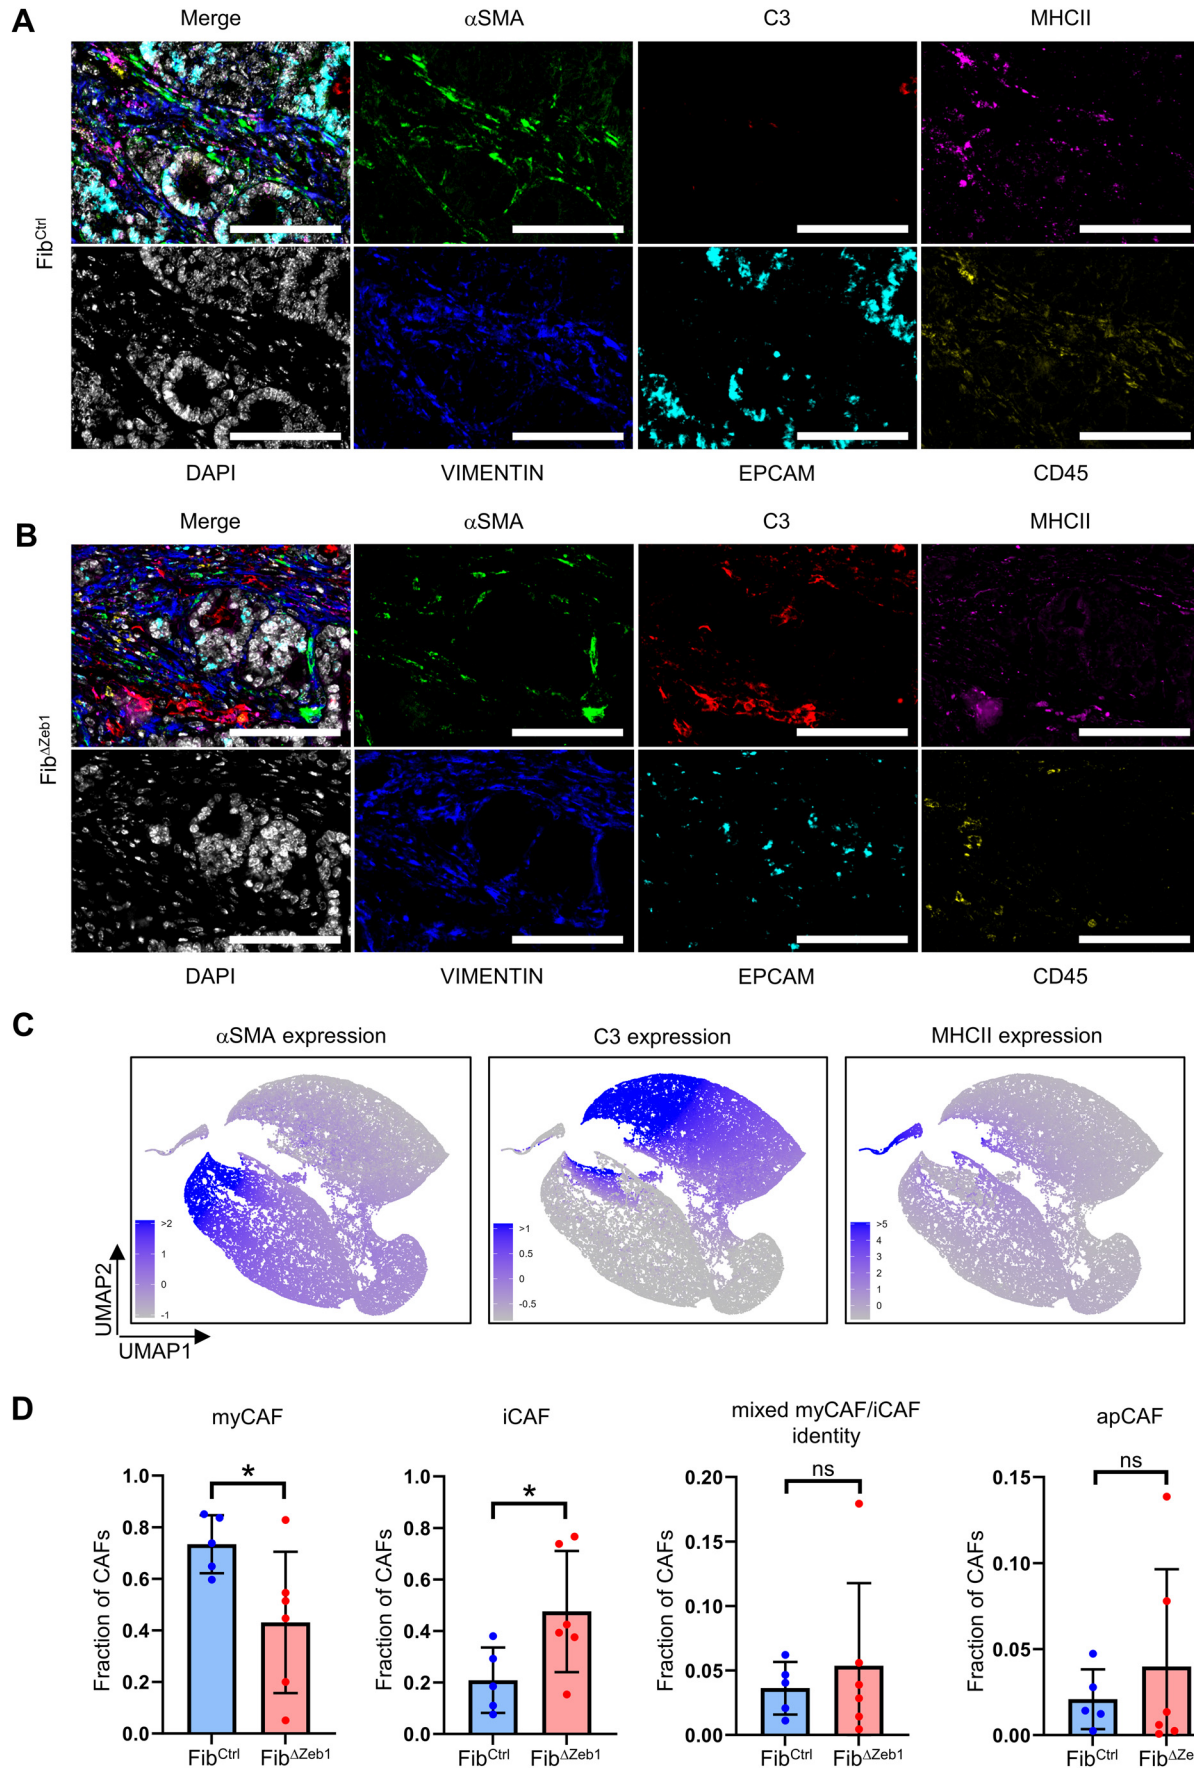

**◀ Figure EV3. Multiplexed IF staining of tumor sections reveals an enrichment of iCAF-like cells in Fib<sup>ΔZeb1</sup> tumors.**

(A, B) Single marker images (VIM, αSMA, C3, MHCII, EPCAM, CD45, DAPI) and merge of all channels for the representative images of Fib<sup>Ctrl</sup> (A) and Fib<sup>ΔZeb1</sup> (B) orthotopic tumors shown in Fig. 2K. (C) Normalized staining intensities of CAF markers (αSMA, C3, MHCII) in UMAP embedding of CAFs from Fib<sup>Ctrl</sup> and Fib<sup>ΔZeb1</sup> tumors. (D) Quantification of the distribution of CAF subtypes based on thresholds for αSMA (myCAF-like), C3 (iCAF-like) or MHCII (apCAF) staining intensity ( $n = 5/6$  independent mice for Fib<sup>Ctrl</sup>/Fib<sup>ΔZeb1</sup>, myCAF:  $P = 0.0469$ , iCAF:  $P = 0.0499$ , Student's  $t$  test). Data information: Data are presented as mean  $\pm$  SD (D). Scale bars represent 100  $\mu$ m (A, B). Source data are available online for this figure.

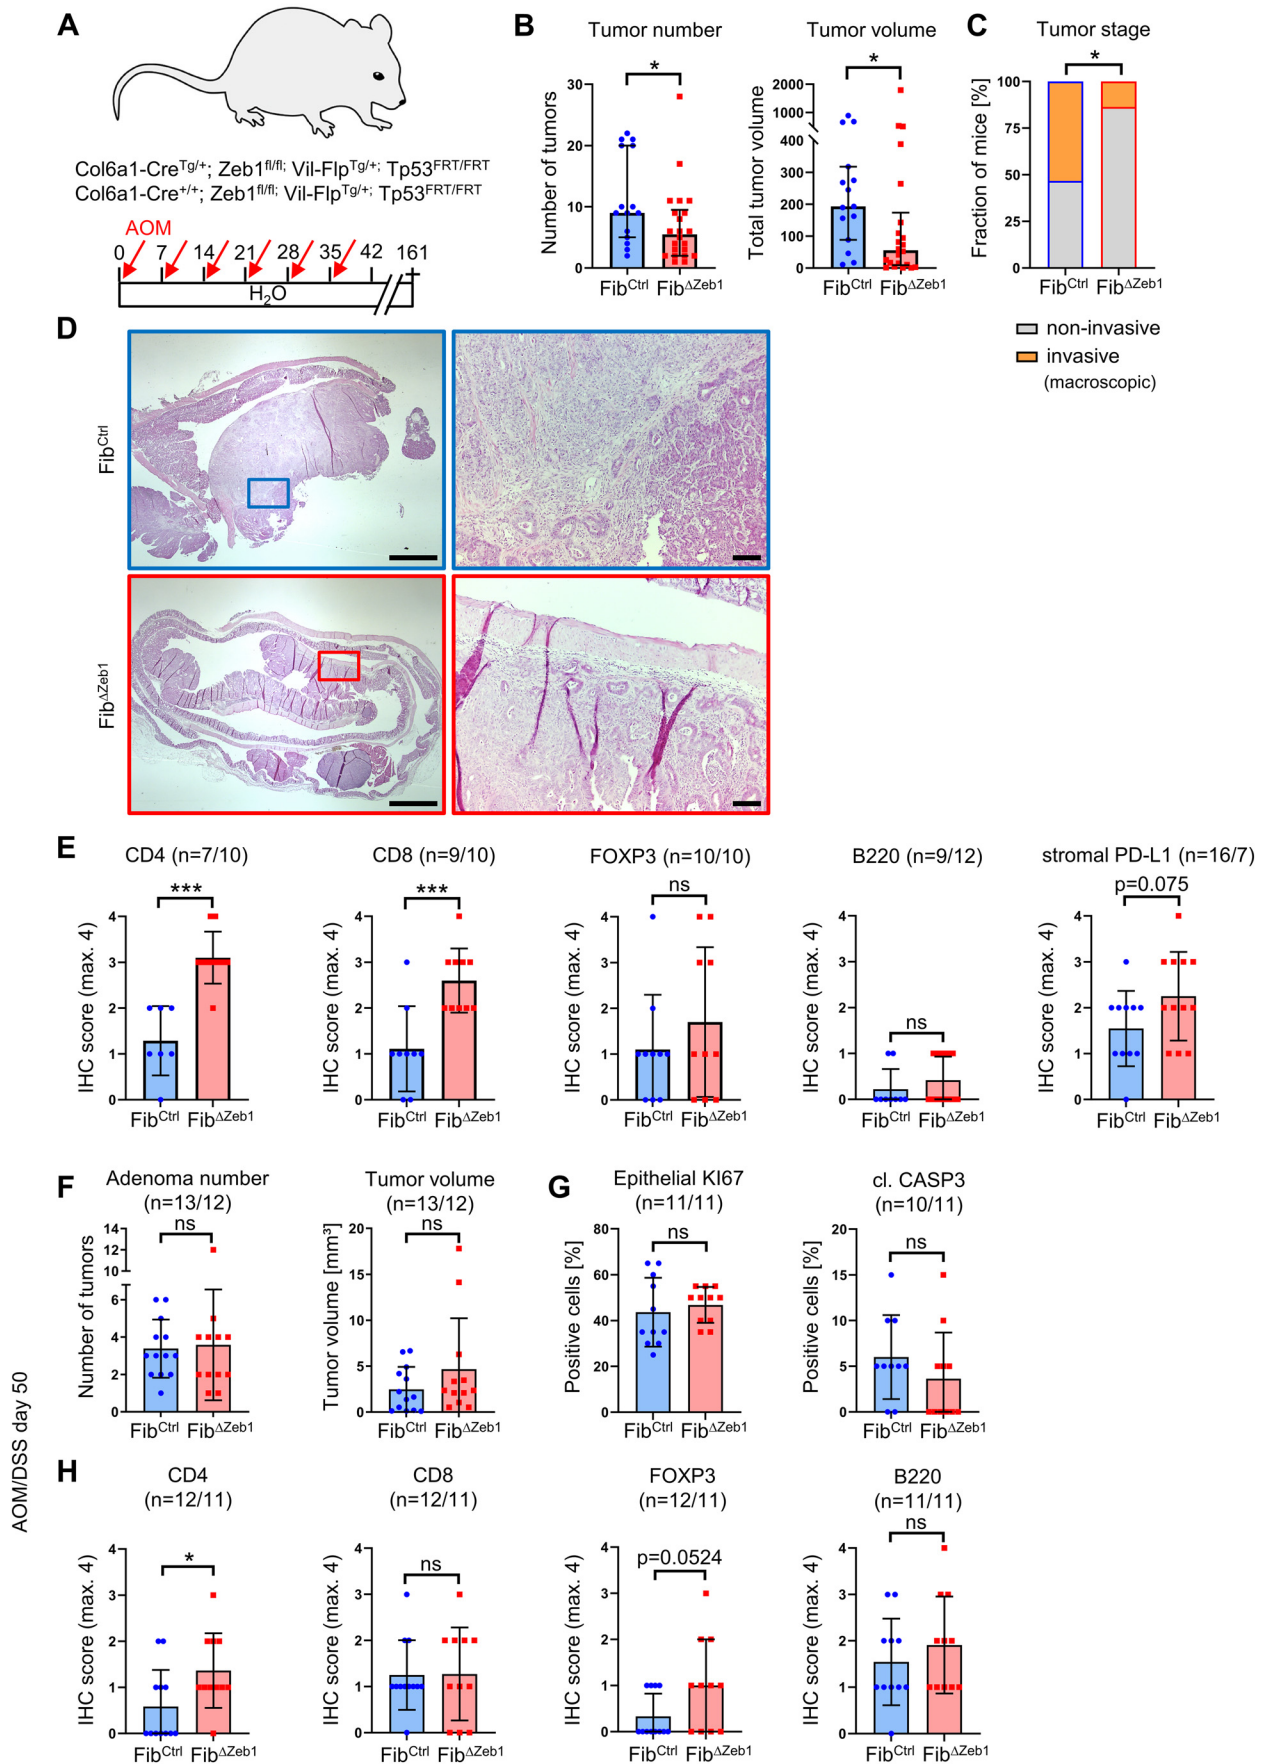

◀ **Figure EV4. Loss of *Zeb1* in fibroblasts impairs tumor progression and increases T-cell infiltration in the invasive non-inflammation-driven AOM/p53 model.**

(A) Schematic representation of the AOM/p53 model. (B) Quantification of numbers and volumes of tumors in the colons of Fib<sup>Ctrl</sup> and Fib<sup>ΔZeb1</sup> mice at the endpoint ( $n = 15/22$  for Fib<sup>Ctrl</sup>/Fib<sup>ΔZeb1</sup>, number:  $P = 0.0433$ , volume:  $P = 0.0202$ , Mann-Whitney test). (C) Macroscopic evaluation of the most advanced/progressed tumor per mouse categorizing 'T4' as fully invasive (penetrating the muscle) or not ('T1-T3') (fraction of mice is given,  $n = 15/22$  for Fib<sup>Ctrl</sup>/Fib<sup>ΔZeb1</sup>,  $P = 0.0252$ , Fisher's exact test). (D) Representative H&E stainings with a higher magnification of the indicated region to the right. (E) IHC-based quantification of immune cell infiltration and stromal PD-L1 expression of tumors from Fib<sup>Ctrl</sup> and Fib<sup>ΔZeb1</sup> mice. Numbers of experimental mice per genotype are indicated (CD4, CD8, FOXP3, B220, PD-L1:  $P < 0.0001$ ,  $P = 0.0010$ , 0.3618, 0.3748, 0.0745, Student's *t* test). (F-H) AOM/DSS model until day 50 in Fib<sup>Ctrl</sup> and Fib<sup>ΔZeb1</sup> mice. Macroscopic analysis of early adenomas (number:  $P = 0.8339$ , volume:  $P = 0.2088$ , Student's *t* test) (F) and IHC quantification of epithelial proliferation and cell death (KI67:  $P = 0.5403$ , cl. CASP3:  $P = 0.2773$ , Student's *t* test) (G), as well as immune cell infiltration (H). Numbers of experimental mice per genotype are indicated (CD4, CD8, FOXP3, B220:  $P = 0.0296$ , 0.9515, 0.0524, 0.3996, Student's *t* test). Data information: Data are presented as mean  $\pm$  SD (B, E-H). Scale bars represent 1.5 mm (D, left) or 100  $\mu$ m (D, right). Source data are available online for this figure.



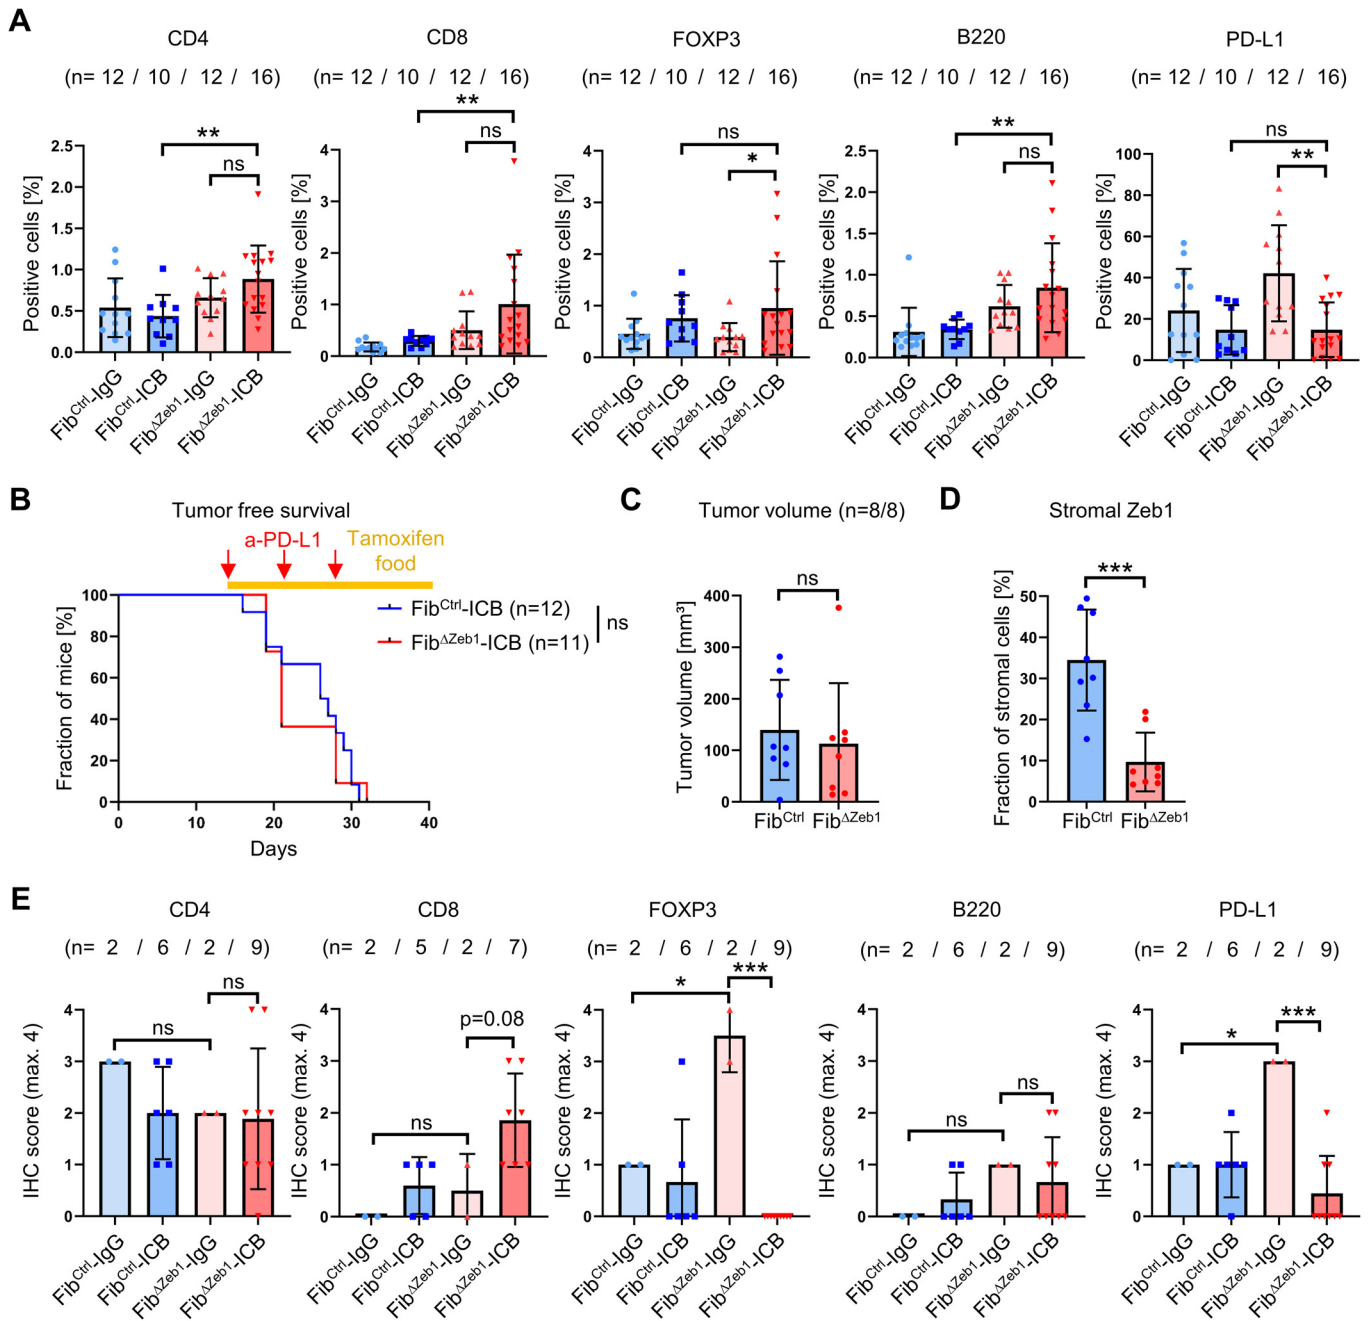

**Figure EV5. Monitoring of immune cell infiltration after ICB and effect of late-stage deletion of *Zeb1* on ICB.**

(A) IHC-based quantification of immune cell infiltration and PD-L1 expression in tumors from Fib<sup>Ctrl</sup> and Fib<sup>ΔZeb1</sup> mice after orthotopic transplantation of AKP<sup>e</sup> organoids and intraperitoneal injection of a-PD-L1 antibodies or control IgGs. Numbers of experimental mice per condition are indicated (CD4, CD8, FOXP3, B220, PD-L1:  $P = 0.0032, 0.0076, 0.6442, 0.0027, >0.9999$  (Fib<sup>Ctrl</sup>-ICB vs Fib<sup>ΔZeb1</sup>-ICB),  $p = 0.1568, 0.0525, 0.0304, 0.2150, 0.0004$  (Fib<sup>ΔZeb1</sup>-IgG vs Fib<sup>ΔZeb1</sup>-ICB), Šidák's multiple comparisons test). IgG-treated mice contributed to initial AKP<sup>e</sup> analysis (Fig. 1). (B) Kaplan-Meier analysis showing tumor-free survival of Fib<sup>Ctrl</sup> and Fib<sup>ΔZeb1</sup> mice after orthotopic transplantation of AKP<sup>e</sup> organoids and intraperitoneal injection of a-PD-L1 antibodies or control IgGs, as indicated by red arrows. Recombination of *Zeb1* was induced by tamoxifen food starting from day (d) 14. Mice were considered tumor-free if no tumor was detected by palpation. Numbers of experimental mice per condition are indicated ( $P = 0.7583$ , Mantel-Cox test). (C) Quantification of tumor volumes after orthotopic transplantation of AKP<sup>e</sup> tumor organoids and ICB with late recombination of *Zeb1*. Only tumors collected after d28 were included in this analysis ( $n = 8$  independent mice,  $P = 0.6276$ , Student's *t* test). (D) IF-based quantification of stromal cells expressing ZEB1 ( $n = 8/8$  independent mice for Fib<sup>Ctrl</sup>/Fib<sup>ΔZeb1</sup>,  $P = 0.0002$ , Student's *t* test). (E) IHC-based quantification of immune cell infiltration and PD-L1 expression in AOM/DSS tumors from Fib<sup>Ctrl</sup> and Fib<sup>ΔZeb1</sup> mice receiving ICB (2 intraperitoneal injections of a-PD-L1 and a-CTLA-4 antibodies or control IgGs per week starting at d70 of AOM/DSS tumorigenesis). Numbers of experimental mice per condition are indicated (CD4, CD8, FOXP3, B220, PD-L1:  $P = 0.9902, 0.0802, <0.0001, 0.0070, 0.0003$  (Fib<sup>ΔZeb1</sup>-IgG vs Fib<sup>ΔZeb1</sup>-ICB),  $P = 0.6241, 0.7615, 0.0070, 0.3163, 0.0144$  (Fib<sup>Ctrl</sup>-IgG vs Fib<sup>ΔZeb1</sup>-IgG), Šidák's multiple comparisons test). Data information: Data are presented as mean  $\pm$  SD (A, C-E). Source data are available online for this figure.
